# Supplementary material for: One-step large-scale deposition of salt-free DNA origami nanostructures
Source: PubMed Central journal article supplement (PMC4616047; doi:10.1038/srep15634), 2015-10-23
Supplement: srep15634-s1.pdf [file srep15634-s1.pdf]

# Supplementary Information

## *One-step large-scale deposition of salt-free DNA origami nanostructures*

**Veikko Linko<sup>1</sup>, Boxuan Shen<sup>2</sup>, Kosti Tapio<sup>2</sup>, J. Jussi Toppari<sup>2</sup>, Mauri A. Kostiainen<sup>1\*</sup> and Sampo Tuukkanen<sup>3\*</sup>**

**1** Biohybrid Materials, Department of Biotechnology and Chemical Technology, Aalto University, P.O. Box 16100, FI-00076 Aalto, Espoo, Finland

**2** University of Jyväskylä, Department of Physics, Nanoscience Center, P.O. Box 35, FI-40014 University of Jyväskylä, Finland

**3** Tampere University of Technology, Department of Automation Science and Engineering, P.O. Box 692, FI-33101, Tampere, Finland

\*mauri.kostiainen@aalto.fi

\*sampo.tuukkanen@tut.fi

## Contents

|                                                               |    |
|---------------------------------------------------------------|----|
| Note 1. Materials.....                                        | 2  |
| Note 2. TEM imaging .....                                     | 2  |
| Note 3. Stability of DNA origami nanostructures in water..... | 3  |
| Note 4. Details of DNA origami nanostructures.....            | 3  |
| Supplementary information references .....                    | 12 |

## Note 1. Materials

All reagents are commercially available and applied without any further purification. In all procedures the water used was Milli-Q purified or double-distilled (ddH<sub>2</sub>O).

## Note 2. TEM imaging

Structural properties of multilayer DNA origamis were characterized with transmission electron microscopy (TEM) (see Figure S1). Micrographs were taken with Tecnai 12 Bio Twin instrument. Samples were prepared on Formvar carbon coated /carbon only copper grids (Electron Microscopy Sciences) by pipetting a 3  $\mu$ l drop of the sample solution onto the grid. The droplet was left on the grid for 1 min, and after that the excess solution was blotted away using filter paper. Samples were negatively stained by first applying 3  $\mu$ l of staining solution (0.5 % uranyl acetate in Milli-Q water) and then removing the excess stain again with a piece of filter paper. Additional 3  $\mu$ l droplet of uranyl acetate was then pipetted onto the grid, and excess liquid was blotted away after 20 s. The samples were dried at room temperature for at least 10 min before imaging.

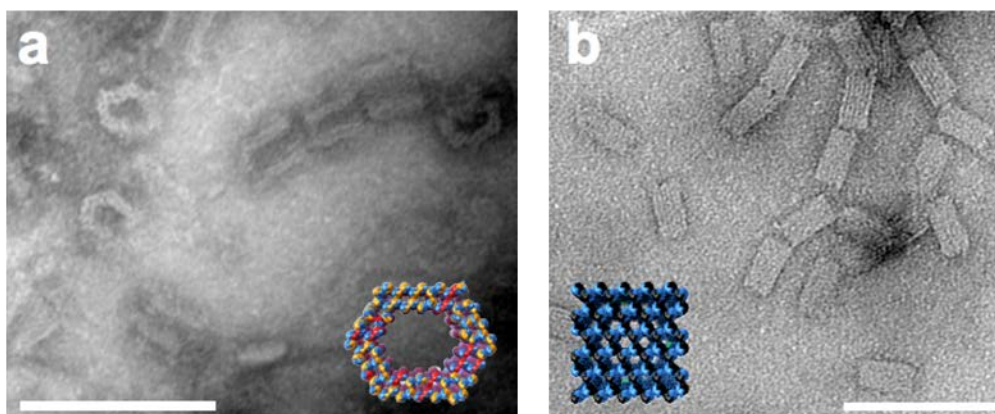

**Figure S1.** Transmission electron micrographs of multilayer DNA origamis used for coating experiments: **a** hexagonal tubes and **b** 60-helix bundles. The insets show the atomic models of the structures. The scale bars are 100 nm.

### Note 3. Stability of DNA origami nanostructures in water

DNA origami nanostructures used in spray-coating were spin-filtered using Milli-Q water. However, this might not be an ideal buffer for storing DNA origamis over long time, since the structures might start to form aggregates. However, using low concentrations as in Fig. S2, the gel data shows that the structures can be stable even after 14 weeks of storing. Nevertheless, all the experiments reported in this article were performed right after spin-filtering.

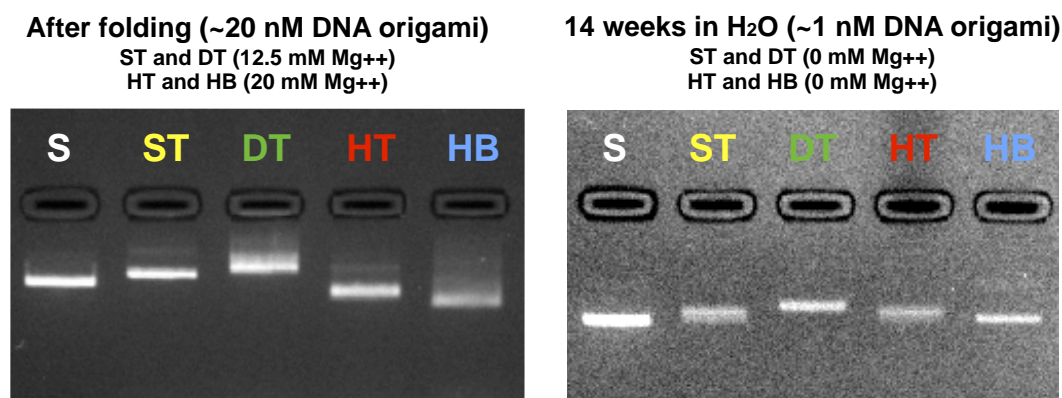

**Figure S2.** Agarose gel electrophoresis of the DNA origami nanostructures. The structures can stay intact in water over long time, and the agglomeration can be avoided if the low concentrations are used. Note that the structures (especially HT and HB) run with different speeds in water and in the folding buffer as explained in the main article and in Figure 2.

### Note 4. Details of DNA origami nanostructures

Sequence maps and sequences for a double-triangle and 60-helix bundle are listed below. These details for a Seeman tile and a hexagonal tube have been previously published (see Supplementary Information of the publications [S1] and [S2]).

For fluorescently labeled origamis (hexagonal tube and 60-helix bundle) linker strands were used. All linkers contain a specific part that binds to the scaffold strand, and an overhanging sequence **TTTTTCTCCTTTCCC** which binds to a Cy5-labeled fluorescent strand 5'-Cy5-GGGAAAGGAGAAAAA-3'.

**Table S1.** 5 linkers for a hexagonal tube.

|                                                     |
|-----------------------------------------------------|
| CAACTAATCATAACCAGACGACTGGATAGCGTTTTTTTCTCCTTTCCC    |
| TGGTCAGTACAGTTGACAGGTCAGTTTTTTTCTCCTTTCCC           |
| CCAAGCGGCCTGATGAAATCCTGAAAGAGGACATTTTTTCTCCTTTCCC   |
| GAATACGAAACCGGATAGCCAAGCCCTTTTAAGAATTTTTTCTCCTTTCCC |
| AAGCTTGAATCATGGTTTTTTTCTCCTTTCCC                    |

**Table S2.** 6 linkers for a 60-helix bundle.

|                                  |
|----------------------------------|
| GTGAGGCGGTCATTTTTTCTCCTTTCCC     |
| GTTTACCAGCGCTTTTTTCTCCTTTCCC     |
| CCATCGCCCACGCATATTTTTTCTCCTTTCCC |
| GGGCCTCTTCGCTATTTTTTTTCTCCTTTCCC |
| GCGATAGCTTAGTTTTTTTCTCCTTTCCC    |
| CTATCATAACCCTCGTTTTTTTCTCCTTTCCC |

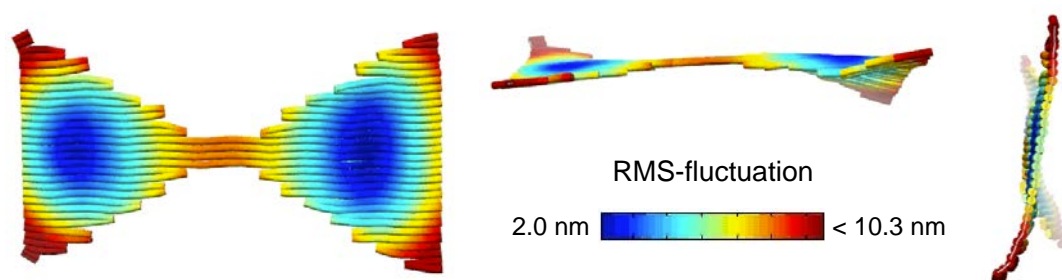

**Figure S3.** Predicted solution shape and fluctuations of a double-triangle. The simulation was performed using caDNAno design file as an input for CanDo modeling. Three views along different orthogonal directions are presented. The simulation based on a rigid-beam model of DNA indicates that a double-triangle is highly flexible.

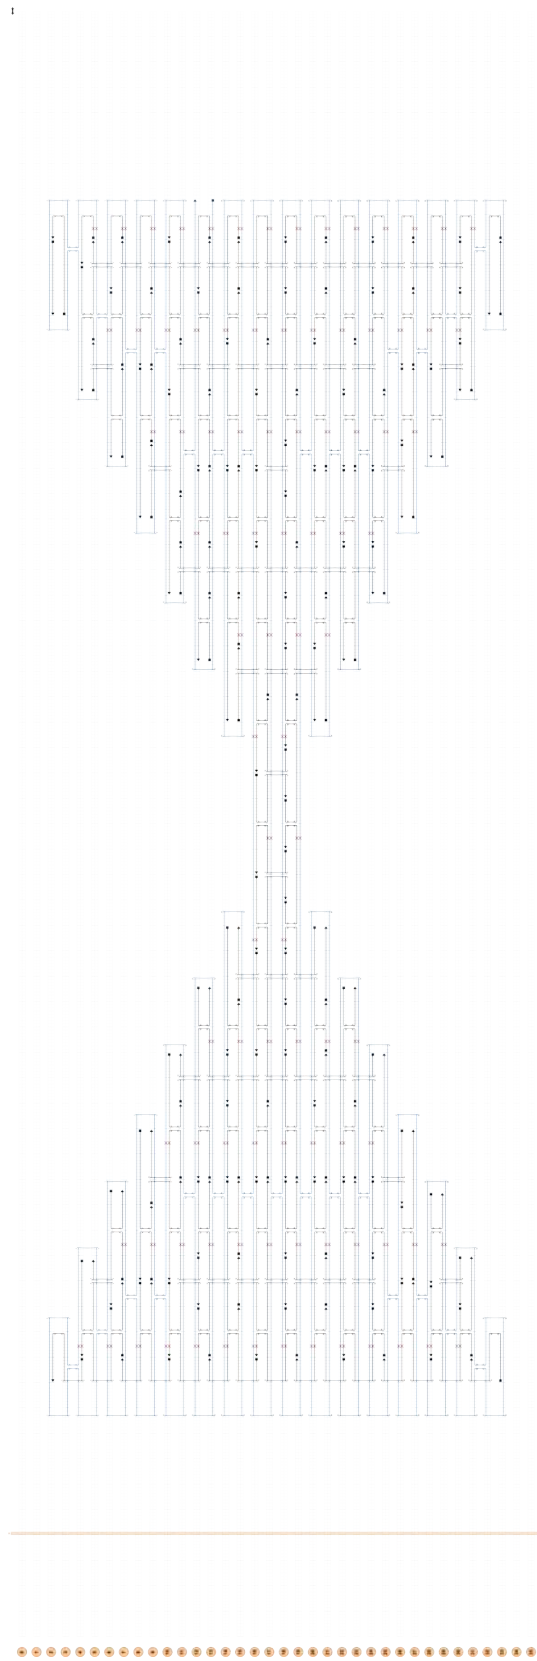

**Figure S4.** A caDNAno design for a double-triangle. Some of the bases of the scaffold strand have been skipped in the design in order to avoid global twisting of the shape.

**Table S3.** 163 staple strands for a double-triangle.

| Start   | End     | Sequence                                           |
|---------|---------|----------------------------------------------------|
| 11[408] | 10[392] | ACTATGGTGGGATTTTAGGGTCAGTTGGCAA                    |
| 14[183] | 11[183] | TAACTATATTCATCTTCTGACCTTAAATAAGGCGTTAAACAGTATAA    |
| 14[407] | 11[407] | TATAAATCCACTATTAAGAACGTGCGCTGGCAAGTGTAGGGCGCGT     |
| 22[87]  | 19[87]  | CCCTCAGAGTCATAGCCCCCTTATAGCGTCAGACTGTAGTCACCAGT    |
| 4[431]  | 6[424]  | AGAGATAGAACCCTTCAATATTACCGCCAGCCTGGTAATA           |
| 19[392] | 22[392] | TTTTTAAAAATTTTTGTTAAATAGAGAATCGATGAACGGGCTATCA     |
| 18[143] | 19[143] | ATGTGAATATTGACGGGAAACCATCGAAGCGA                   |
| 18[279] | 16[272] | TCCAGCCAATCATGGTCATAGCTGGCAAAGAAGATGAT             |
| 26[375] | 24[368] | AATCCCCCGGTAATAGTAAAATGAATGCCTGAGTAAGAG            |
| 27[400] | 26[400] | AGTCAGCATCAATTCTGCCTCAGAGCTACTG                    |
| 25[392] | 23[407] | GGATAGCGTCCAAATAAAGCTAAAAATTTTTAGAACCCCTTGAGAAAG   |
| 7[400]  | 5[407]  | AGGTGAGCAATACTTCGTCTTTAATGCGCGATTTTGAAT            |
| 27[352] | 26[376] | CGAGAATGACCATAAATCAAAAATCAGGTCTATTCAATTG           |
| 3[416]  | 2[440]  | GTAATAAAAGGGACATTCTGGTTTTGACGCTCAATGGATT           |
| 19[296] | 20[288] | GACAGATGCCAGAACGAGTAGTAA                           |
| 17[144] | 16[144] | AGGCGATTAAGTTGGGCTGTAAATCGTCGCT                    |
| 18[199] | 21[199] | GGGAAGGGTGATAAATTGTGTCGAACACTACGAAGGCACCAAAGGACTAA |
| 16[87]  | 13[87]  | ATTTTGTCTGGCATGATTAAGACTCGAGGAAACGCAATAAATAATAA    |
| 15[120] | 12[120] | ACGTAGACAGATAGCCGAACAATAGCTATCTTACCGACTGAACAA      |
| 25[328] | 24[344] | AATAGCGAGAGGCTTTTGCAAAAAGCTCGTTT                   |
| 21[288] | 20[312] | AGATGGTTTTAATTTCAACTTTAATCATTGTGGCCCTGAC           |
| 14[143] | 15[143] | CAAAGAGAAAAGTAAGAAATACATACATTAAT                   |
| 9[352]  | 11[359] | TCTAAAGCATCACCTTAAGGTTATCTAAAATAGAGGATTT           |
| 8[111]  | 9[111]  | ATAGAATCTTACCAACTATTATTTATCAGCCA                   |
| 18[247] | 16[240] | CGGAAACCAGGATCCCCGGGTACAAACAAAATTAATTAC            |
| 10[87]  | 7[87]   | GATTTTTTACAAAATAAACAGCCAGCTAACGAGCGTCTTTTGCACCC    |
| 27[424] | 30[424] | TAGTAGCACATTTGGGGCGCGAGCTAGTTTGACCATTAGATGCGAACG   |
| 15[328] | 18[328] | TTAACGTCCAAGTTACAAAATCGCTTCCACACAACATACGGTGCATCT   |
| 13[344] | 11[343] | GCGGAATTCGTATTAATCCTTTAATAGATA                     |
| 6[103]  | 7[111]  | TCCTTATCTTTTATCCTGATAAGT                           |
| 21[424] | 24[424] | TCATATGTAGAGGGTAGCTATTTTTCAGTCAAATCACCATCTCAACGCA  |
| 27[112] | 26[112] | CACAGACAGCCCTCATAAACAACTTTCAACA                    |
| 15[424] | 18[424] | GCGGTCCAGGGAGAGGCGGTTTGCCTTTCCAGTCGGGAAGCGAGTAA    |
| 18[311] | 15[311] | GACGACAGGTTATCCGCTCACAAGCAGAGGCGAATTATTAGAAATTG    |
| 22[391] | 25[391] | GGTCATTGTAAAGATTCAAAGGGGCATATATTTTAAATGCTTTAGACT   |
| 18[327] | 21[327] | GCCAGTTTAGGCGCATAGGCTGGCTCAGTGAATAAGGCTTAATTACCT   |
| 23[144] | 22[144] | AATTTCTTAAACAGCTTTTGCGGGATCGTCA                    |
| 24[367] | 26[352] | CAACACTATCATAACCAAGTTTTGCCAGAGGGTCAAATGCTTTAAACA   |
| 7[440]  | 5[439]  | CCTGAGTAAACTATCGGCCTTGCATTGCAAC                    |
| 18[359] | 18[376] | GTGTAGATTAATCTTGACAAGAACCGGATTTTTGTTAAAACCGTAAT    |
| 4[87]   | 2[80]   | TTTTTCTACGGTATCATCGTAGGACGCCAATAGCAAGCA            |
| 11[344] | 10[328] | ATACATTTTCTTTAGGAGCACTAACAATAAT                    |
| 10[439] | 7[439]  | GAGCTAAAAGTGTTTTTATAATACCGAGTAAAAGAGTCATCACTTG     |
| 4[118]  | 6[104]  | CACTCATCGAGAACAAGCAAGCCATTCCAAGAACGGGTAGCTGTCTT    |
| 30[439] | 27[439] | CCCAATTCTACATTTTCGCAAATGTGTTTAGCTATATTTTTTAAACATC  |
| 24[103] | 24[120] | TTAAAGCCCTTTTGTATGATAGCGGAGTGAGAATAGAAAGTATTCACA   |
| 30[103] | 31[119] | ACCACCCTCGCCACCCTCAGAACC GCCACCCT                  |
| 21[184] | 18[184] | GGCTTTGCCTAAAACGAAAGAGGATTTGTATCATCGCCCGATCGGT     |
| 21[440] | 18[440] | TGATAATCCAAAACAGGAAGATCTGGCCTTCTGTAGTCAACATT       |
| 18[119] | 15[119] | CATTAAAGTTCAACCGATTGAGGACATATAAAAAGAAACGGTTAGCAA   |
| 11[144] | 9[159]  | TTTAGTATCATATGCGGAATCGCCATATTTAGTAAAGTAATTCTGTC    |
| 16[215] | 15[223] | CCTTTTTTGTGAATTTATCAAAAT                           |
| 14[223] | 15[199] | AGAGACTACCTTTTTAACCTCCGGCTTAGGTTCTGAGAAG           |

|         |         |                                                  |
|---------|---------|--------------------------------------------------|
| 30[119] | 28[111] | CGCCACCCAAGCCCAATAGGAACTACAAACTACAACGCCT         |
| 10[391] | 13[391] | ATCAACAGTTAATGCGCCGCTACAGCGGTACAGCTGCGCGGTTTGGAA |
| 12[103] | 15[103] | AGCGCTAAAACAATGAAATAGCAAGTTACCAGAAGGAAACCCTTATTA |
| 31[88]  | 28[88]  | TTAGTACGAGAAGGATTAGGATGGCTGAGACTCCTCAATCGGAAC    |
| 9[424]  | 12[424] | ATCCTGAGCAGGAGGCCGATTAATGCTTTGACGAGCAGGAGCGG     |
| 28[139] | 29[139] | TTTCGTCACCAGCCATGTACCGTA                         |
| 17[296] | 19[295] | GTGAAATTTATCGGCCTCAGGAAGTGAAAGAG                 |
| 33[416] | 33[439] | TATAATGCTGTAGCTCAACATGTT                         |
| 18[423] | 21[423] | CAACCCGTCAAAAATAATTCGCGTTGTATAAGCAAATATTCATGTCAA |
| 6[423]  | 9[423]  | TCCAGAACTTTGATTAGTAATAACTGTCCATCACGCAAATACGCCAGA |
| 22[343] | 19[343] | CTAACGGATTTAAGAACTGGCTCAAACAAAGCTGCTCATTGACCTTC  |
| 6[140]  | 7[140]  | ACGAGCATGTAGATAATATCCCATCC                       |
| 12[423] | 15[423] | GCGCTAGGGGACTCCAACGTCAAAGTTCCGAAATCGGCAATGCAGCAA |
| 18[215] | 16[216] | AGGCTGCGGCCAAGCTTGCATGCCTGAATTA                  |
| 24[423] | 27[423] | AGGATAAATCGGTTGTACCAAAAAAAAAATTAAGCAATAAACTAATAG |
| 9[400]  | 8[400]  | TATCTACAGGAACGGTTAACCGTTGTAGGCG                  |
| 23[368] | 22[368] | ATAGTAATGTGTAGGCCTGAGAGTCTGAAGA                  |
| 13[307] | 12[307] | ATTATCATTTTGCTTTTAAAAGTTTG                       |
| 13[328] | 15[327] | GAAACCACTGGATTATACTTCTGATTTTCAGGT                |
| 33[440] | 32[416] | TTAAATATTACGGTGTCTGTTTTCGCGATGGCTTAGAGCTT        |
| 18[263] | 18[280] | GCACCGCTGTCAATCATAAGGGAACCGAACTGACCAACTTATCGCAC  |
| 21[200] | 21[223] | AGACTTTTTCATGAGGAAGTTTCC                         |
| 26[135] | 27[159] | GATTTTGCTAGTTAGCGTAACGATCTAAAGTTTTGTGCTC         |
| 24[439] | 21[439] | CCTTTATTAATATGATATTCAACGATAAATTAATGCCGGACCCCGGT  |
| 15[144] | 14[144] | TTTCCCTTAGAATCCTAATCCAATCGCAAGA                  |
| 15[440] | 13[439] | TGCCCCAATCCTGTTTGTGGTGGGGCGAAA                   |
| 21[328] | 24[328] | TATGCGATACAACATTATTACAGGCCACATTCAACTAATGACGATAAA |
| 20[367] | 21[367] | TTACCCAAATCAACGTTTATAACCAGTCAGGAC                |
| 23[168] | 25[183] | ATAGTTGCAGCCTTTAATTGTATCTTCAGTTGAAAATCTCCAAAAA   |
| 26[111] | 27[111] | GTTTCACAGGAGTGTACAGTTAATGCCCATTC                 |
| 21[368] | 20[368] | GTTGGGGAGCAAACATCGCATTAAATATTCA                  |
| 18[375] | 16[368] | GGGATAGGCCTAATGAGTGAGCTCCAGTGAGACGGAAAC          |
| 20[407] | 17[407] | TAAACGTTCCAATAGGAAACGCCATCGGATTCTCCGTGGGGTTGCGCT |
| 27[440] | 24[440] | CAATAAAAAGGCAAAGAATTAGCCATTATGACCCTGTAGGGAGAAG   |
| 13[368] | 12[368] | TTATCTGTTGTTCCATAACCACCACATTTAC                  |
| 15[200] | 18[200] | AGTCAATAAATGAAACAGTACATTAAAACGACGGCCAGTCAACTGTT  |
| 10[183] | 11[167] | CGCTCAACAGTAGGGCTTAATTGATTATACAA                 |
| 30[423] | 30[440] | AGTAGATTTCTTTTGATAAGAGGTCATTGAAGTTTCATAGTTGATT   |
| 8[159]  | 9[135]  | CAATAAACAACATGTTTCAGCTAATGCAGAACGAAAGTACC        |
| 22[204] | 23[204] | CCGATATATTGGAACCATCGCCAC                         |
| 19[144] | 18[144] | TTATACCAAGCGCGAAGCTGGCGAAAGGGGG                  |
| 9[376]  | 8[352]  | TCAAATACCTGCAACAGTGCCACGCTGAGAGCCAGCAGC          |
| 15[368] | 14[368] | CGGGAGGCAACAGCTATAGGGTTGAGAGATG                  |
| 5[440]  | 4[432]  | AGGAAAAAATACCTACACCAAC                           |
| 14[167] | 17[167] | CTGATGCATGAAAACATAGCGATAGTGAATAACCTTGCTTTAACGCCA |
| 16[367] | 18[360] | AATAACGGATTCGCCTTGTAAGCCTGGGGTGTACGTTG           |
| 11[168] | 14[168] | ATTCTTACTAAGAATAAACACCGGATATATTTAGTTAATTGTAAATG  |
| 16[183] | 14[184] | ATATGTGAGCTTAGATTAAGACGGGGTTATA                  |
| 15[288] | 17[295] | CGTAAAACAGAAATAACATTTCAATTACCTGATTTCTGT          |
| 9[112]  | 8[112]  | GTAATAAGAGAATATCGCCTGTTTATCAACA                  |
| 21[120] | 18[120] | CAAAATCTAATCAGTAGCGACAGGGAAACGTCACCAATAAATTATT   |
| 19[344] | 16[344] | ATCAAGAGGGGCGCATCGTAACCAGCCGGAAGCATAAAGGATTGCT   |
| 24[143] | 26[136] | TTTCGATTGGCCTTGAGAACAATAAAGGAATCTGTATGG          |
| 17[408] | 14[408] | CACTGCCCGTATTGGGCGCCAGGCTGGCCCTGAGAGAGTAATCCCT   |
| 16[271] | 18[264] | GAAACAAACATCAAGACGAGCTCGAATTCGTAGCTTTCCG         |
| 20[167] | 23[167] | TACACTAAAACGAGGGTAGCAACGGGAGTTAAAGGCCGCTTGATACCG |
| 12[367] | 13[367] | AAACAATTGACAACACTATCATCATATTCCTGA                |

|         |         |                                                   |
|---------|---------|---------------------------------------------------|
| 18[183] | 16[184] | GCGGGCCTCCAGTCACGACGTTGAAATCAAT                   |
| 16[343] | 13[343] | TTGAATACAGATGAATATACAGTAATAATCCTGATTGTTTCAGAAGGA  |
| 13[144] | 12[144] | GAGAAAACCTTTTTCAAATCATAATTACTAG                   |
| 2[439]  | 2[416]  | ATTTACATTGGCAGATTCACCAGT                          |
| 29[371] | 28[371] | CGAAAGACTTCAAAAAAGATTAAGAG                        |
| 16[391] | 19[391] | TCTTTTCAAACCTCACATTAATTGCAACAAACGGCGGATTGTCAGCTCA |
| 12[204] | 13[204] | ACCGACCGTGTGAAAATTTAATGGTT                        |
| 24[183] | 21[183] | CCAAAAGGGCCGACAATGACAACCTCGCTGAGGCTTGCAAGGCTACAGA |
| 12[143] | 13[143] | AAAAAACTGAACACCAGCCCTTTTTAAACGC                   |
| 7[371]  | 6[371]  | GAACGAACCACCACATCGCCATTA                          |
| 22[143] | 23[143] | CCCTCAGCCACCACCGCAGGTCAGACGAGGTG                  |
| 15[104] | 18[104] | CGCAGTATCAAAGACACCACGGAAAGACAAAAGGGCGACAGTGAATTA  |
| 30[407] | 28[400] | GGAAGCAACGAGCTTCAAAGCGAATGAAAAGGTGGAAGC           |
| 23[307] | 22[307] | AGATTTAGGAATATAGAAAGATTCAT                        |
| 8[399]  | 9[399]  | GTCAGTATTAACACCGTCAAACCCTCAATCAA                  |
| 31[392] | 30[408] | GGATTAGAGAGTACCTTTAATTGCCAGACC                    |
| 28[399] | 30[392] | AAAGCGGATTGCATCAATATCGCGTTTTAATTACTCCAAC          |
| 7[112]  | 5[118]  | CCTGAACAAGAAAAAACCAATCAATAATCGTTAAACC             |
| 16[239] | 18[232] | ATTTAACAATTTTCAATTTGCAGGTCGACTCTAGAGGCCAAAG       |
| 25[88]  | 22[88]  | ATACATGGAGAATGGAAAGCGCACCAGAACCACCACCAGACCGCCA    |
| 22[367] | 23[367] | AAAATCTACGTTAATAAAAAGGAATTACGAGGC                 |
| 15[312] | 14[288] | CGTAGATATAATGGAAGGGTTAGAACCCTACCATATCAAA          |
| 21[104] | 24[104] | GCCATCTTAGCCGCCACCCTCAGAAGCCGCGCCAGCATTAACTCTCA   |
| 24[343] | 22[344] | ACCAGACGCAGATACATAACGCCAAAACGAA                   |
| 33[80]  | 31[87]  | AAGTATAGCCCGAATCCGTACTIONCAGGGATAAAGGCGAGG        |
| 17[168] | 20[168] | GGGTTTTCTTCGCTATTACGCCAACAAAGTACAACGGAGCAAAGAA    |
| 10[111] | 12[104] | TTTCGCCAATCCAATAGAATAACATAAAAAACGGTAATTG          |
| 18[231] | 18[248] | CGCCATTCCATGTTACTTAGCCGGAACGAGGCGCAGACGTCTGGTGC   |
| 13[88]  | 10[88]  | GAGCAAGATATCAGAGAGATAACAGCAGCCTTTACAGAGAAGAAAC    |
| 13[392] | 16[392] | CAAGAGTCAAAGAATAGCCCGAGGATTGCCCTTCACCGCGTGGTTTT   |
| 20[143] | 21[143] | CCCCCTAGCAGCACCGACCGGAACCAGAGCAG                  |
| 24[119] | 21[119] | AACAAATAGACAGGAGGTTGAGGGAACCGCCTCCCTCAGTTCATAAT   |
| 28[87]  | 25[87]  | CTATTATTACAGTGCCCGTATAAACTGGTAATAAGTTTTTAAGCGTC   |
| 12[119] | 10[112] | AGTCAGAGAGGGAAGCGCATTAGATTTAGGCAGAGGCAT           |
| 7[88]   | 4[88]   | AGCTACAAGAGGTTTTGAAGCCTACCTCCCGACTTGCGGGTTTTTA    |
| 23[408] | 20[408] | GCCGGAGATGAGAGATCTACAAAGTAATCGTAAAACCTAGTAAATTG   |
| 9[136]  | 11[143] | GACAAAAGACAACGCCAACATGTAACGGGAGAATTGCCTG          |
| 20[311] | 18[312] | GAGAAACAAACGGTGTACAGACCGAGGGGAC                   |
| 16[143] | 17[143] | ATTAATAAAGGTGGCAGAGGGAAGGTACTGCA                  |
| 18[439] | 15[439] | AAATGTGAACCTGTCGTGCCAGCAATCGGCCAACGCGCGCTGGTT     |
| 20[223] | 18[216] | TAAAATACGTAATGCCAATCCGCGACCTGCTCGCCATTC           |
| 5[408]  | 4[392]  | GGCTATTATGACCTGAAAGCGTAAGAATACGT                  |
| 28[110] | 30[104] | GTAGCCCTGCCTATTCATTTTCAGGGATAGCTCAGAGCC           |
| 19[88]  | 16[88]  | AGCACCATACCGACTTGAGCCATGGTTTACCAGCGCCAATAAGTTT    |
| 18[103] | 21[103] | TCACCGTCTACCATTAGCAAGGCCAATCAAGTTTGCCTTTTAGCGTTT  |
| 11[328] | 13[327] | GAGCCGTCGCCCAGCGTTATTAAGGAACAAA                   |
| 13[440] | 10[440] | AACCGTCAAGGGAAGAAAGCGAATATAACGTGCTTTCCAGAGCGG     |
| 26[399] | 27[399] | CGGAATCGTCATAAATTTACCCTGACTATTAT                  |
| 5[392]  | 7[399]  | GACAATATACTGATAGCCCTAAAAGCAGAAGATAAAACAG          |
| 11[360] | 9[375]  | AGAAGTATTAGACCCCGCGCGCTTGAAAGGAATTGAGGGCTGAACC    |
| 14[367] | 15[367] | ATGGCAATTCATCAATACAGTACCTTTTACAT                  |
| 21[144] | 20[144] | CGAAAGACAGCATCGGAACACTCATCTTTGA                   |
| 26[159] | 24[144] | TTAGTAAATGAATTTTTGCGAATAATAATTTGGTTTTATCAGCTTGC   |



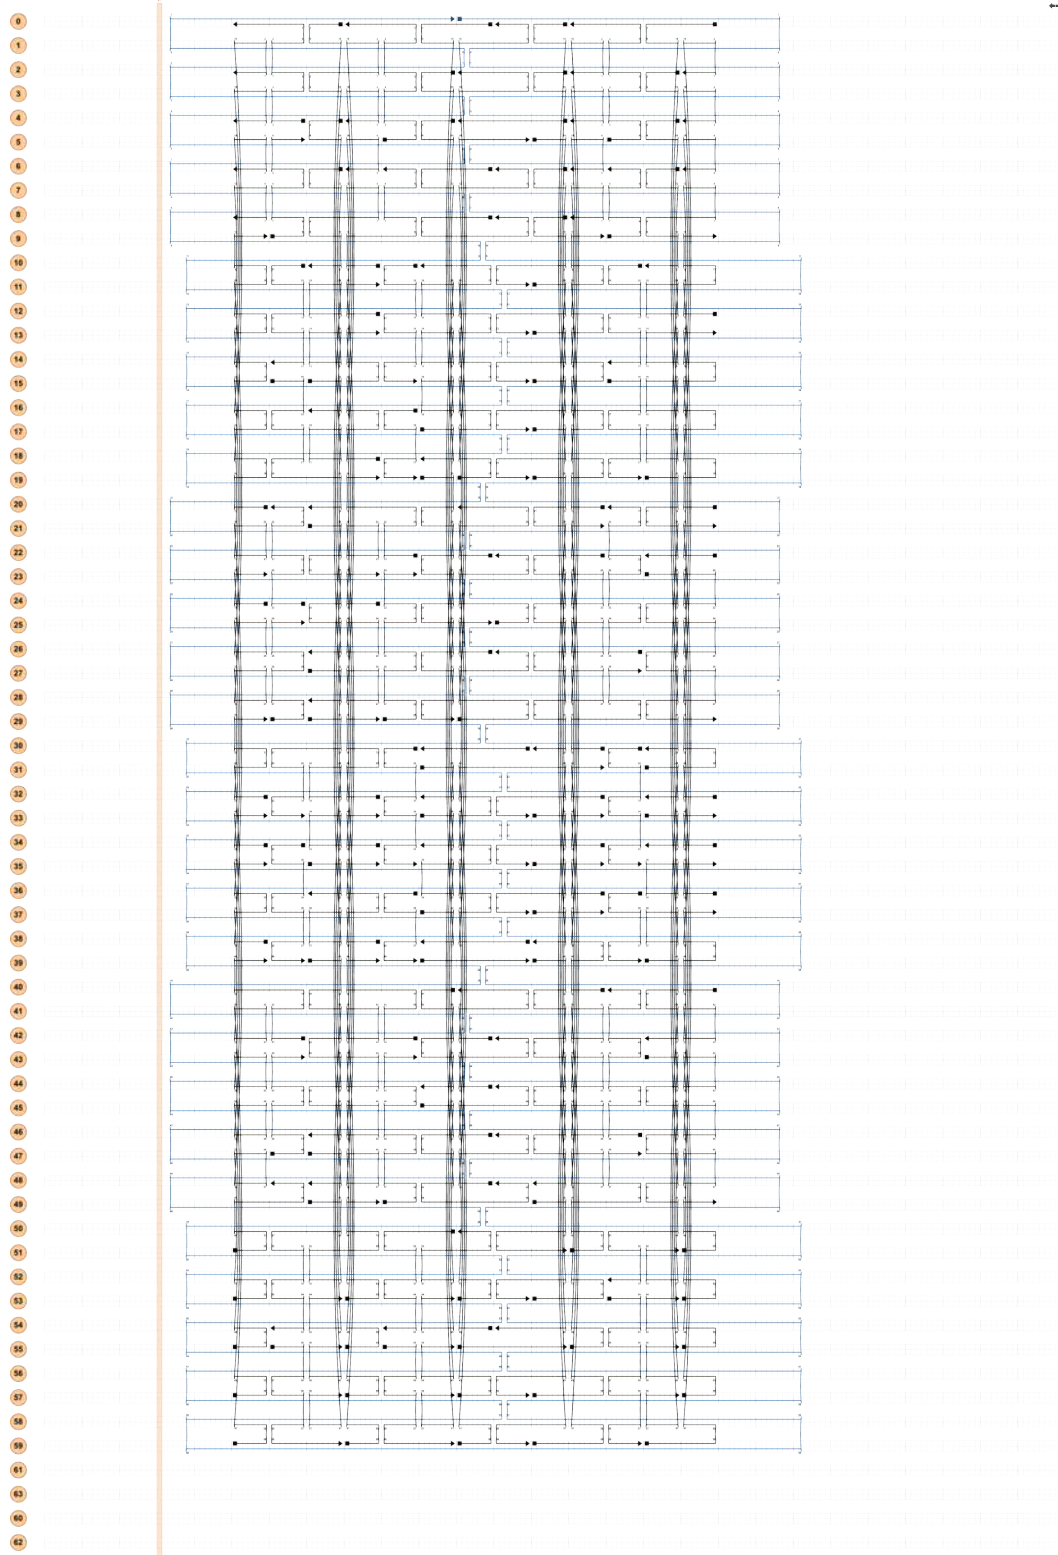

**Figure S5.** A caDNAno design for a 60-helix bundle.

**Table S4.** 141 staple strands for a 60-helix bundle.

| Start   | End     | Sequence                                          |
|---------|---------|---------------------------------------------------|
| 38[90]  | 20[77]  | GATACTTGCCAGTTAAACCATCAATATGGAGCAAACAACAAA        |
| 36[69]  | 39[69]  | GGAGGTTTCGAGCGTAAACAGCGAGAGAA                     |
| 42[83]  | 22[84]  | CTTGCAGGAGCCTACCTCCCGGACCTTTATTTCAAGACAGTC        |
| 39[112] | 57[118] | AAACGAATTATGCGGGGCTTGCAGAACCACCCATG               |
| 39[91]  | 59[90]  | GAAGAACTCATTACACCAGACACCACCCTCATCTGGTTGAT         |
| 53[105] | 59[111] | ATTTTTTCGGAGTGTCTTTCCACAGACAATAGGAGCCACCCGAATAGG  |
| 17[91]  | 37[90]  | ATATTTTGGCCGAGCGCAAGGAAAGAAGTTTTGAAATATAAC        |
| 32[41]  | 9[41]   | AGCATGTAAGAATAGCCAACGCAGTTGAAATATCTCCTGCAA        |
| 30[69]  | 35[69]  | TAAGAGAAACGCGCGAAAAATGGGTATTAGCCGTTAAGAAC         |
| 26[83]  | 6[84]   | CATCCTATTTTAAACTAATAGCTCCTGTGTGAAAGCGTTGC         |
| 4[118]  | 32[112] | CGTATTGCAGCTGCGGTCACGCGACAGTGGTGGCAAATAACCAGGAAGC |
| 15[42]  | 20[49]  | AGATGATAAAATTATAGATTTTTGCTTTATTATTCAATACATTT      |
| 24[41]  | 6[35]   | ACTATATGATTATCGGAGCGGCAGATTCTGAATACG              |
| 29[77]  | 10[70]  | CATTTATTGCTGAAACGAGTAGATTTGTGAGCACTTTAGCATCACCTTG |
| 32[62]  | 11[62]  | AATATCCAATTACTACAAATTGGTTATC                      |
| 57[119] | 35[125] | TACCGTACGCCTGTGAGTAATTCATAAGATAGCGT               |
| 33[112] | 51[118] | TTACCCTACCAAGCCAAAAGAGTTTATCGACAATG               |
| 26[111] | 20[105] | TCAATTCATTAGCACATTATGTTTTAGAAAAGGGTAGCTGAAGGTCAT  |
| 36[111] | 39[111] | GAGAGGCCGAGGCAATACCACGTTAATA                      |
| 53[119] | 29[125] | AAAATCTTGATCGATACACTACTTTTTAACTCCCTCCTTTATATGCA   |
| 32[104] | 9[104]  | ACTTCAATTTTCGCATCCCAATCGCAACTTTAAGTTTGTAATA       |
| 11[91]  | 30[91]  | CAGGCTGTCTGCGATATAATGGATGGCT                      |
| 46[111] | 40[105] | GCGAAACGACCTGCAACTGACCTGACCTAACAAAGGTAAATTATTTAA  |
| 4[48]   | 0[35]   | TTGACGCTAATATCCATCACTCCGAGTAGGTACGCCAGAATC        |
| 15[91]  | 35[90]  | ACATTAATAACTTAGGCAAGCAGAAAACGAGATCCGCCAGA         |
| 16[69]  | 19[69]  | AGGGTTAAGATGAAAACAATAAGCAAAA                      |
| 12[125] | 10[112] | CACCGCTATACGAGGATCCCCGGGTACCCAGTGCCGTGCTGC        |
| 9[42]   | 5[48]   | CAGTGCCAAGATAAGTCTTTAAGCGTAAACCAGTC               |
| 33[91]  | 53[90]  | CATAAATAACGGAGACCAACCGTGAATTTCTTAGCAAAAAGG        |
| 2[76]   | 34[70]  | GTAGCAACATTGCATAATGGATGATTGTACCTTTTTATTTAACAAGCA  |
| 49[91]  | 51[97]  | AGCGAACTTTTTCGGGATCGTTAACAGCTTGATA                |
| 31[70]  | 48[84]  | CTGTTTAATTATTCAAACGTCAACCAACCCTCAGCAATACGT        |
| 2[118]  | 34[112] | AGGCGAACCCCTGAGTAATTCGCAACCCGCCAAAAAAATTAACCTCAA  |
| 17[70]  | 44[70]  | TATACAGGTCGCTATCTGAGAACTTTCGCGCGAGGCAATACCC       |
| 35[49]  | 53[55]  | CTTATCCGATTAAGGGCAACAGGAGGTTACCCTCA               |
| 6[83]   | 29[76]  | GCTCACCAACAGAGAAACATCGATTAGATCTTTAGATCATATGCAGAGG |
| 57[35]  | 35[41]  | GGGTCAGAGTGTACCGAACAAATTACGCTCAGATA               |
| 6[97]   | 13[90]  | ATTAATTTTGTATAAGCGCCATTCGCAAGGTGCA                |
| 53[77]  | 46[84]  | CCACCAGCATCTTTGGCACTACGAAGGCATTTGTA               |
| 19[70]  | 38[70]  | GAAGATGCATCAAGTTCTGTAACAAAAT                      |
| 40[76]  | 57[76]  | AGCGCATAATAATAAACCTATAGTTAAT                      |
| 45[70]  | 53[76]  | AAAGACAGAGCCGCAGAGCCG                             |
| 38[62]  | 4[56]   | CATATTAGTGAATAATTTTCCTAACGTCGAACCTAATATTACGAAATAC |
| 30[104] | 27[111] | TTTTGCGCTGTAGCTCAACATAGTTGATAATGGTC               |
| 4[97]   | 4[77]   | TTTTCTTTTCACCAGTGAGAG                             |
| 33[70]  | 50[77]  | AAACCAAGGAATAATATTGACTCATAATCCCCTTATTAGCGTTCTGAAA |
| 51[119] | 49[125] | ACAACAAGCTGAGGGCAACGG                             |
| 29[42]  | 25[48]  | TATTTAAGTATAAAAACACCGTTTGAAAAAAGAAC               |
| 4[76]   | 32[70]  | GAAAAACACATTCTCATTATCTTATTAATTTTCATGCCTGTTTGAACAA |
| 44[83]  | 25[83]  | GAACGGGGTTTTAGATCGAGAGTAATAA                      |
| 22[125] | 4[119]  | GTAGGTATTGTTAATCAAAAAAGAGTTGCGGTTTTG              |
| 57[91]  | 35[104] | GGGATAGCAAGCCCAGCCCTCAGGCTGGCAACTTTATAGTAA        |
| 18[62]  | 16[49]  | ACGGATTCTGTCCATTGATTAGTAATAACAGAACACCATATC        |

|         |         |                                                    |
|---------|---------|----------------------------------------------------|
| 42[69]  | 39[62]  | CAATGAATAAGCCCTAGACGGGAGAATTCTTTACA                |
| 22[83]  | 2[77]   | AAATCTCTAACAGTTTCTGAAACACGGGCAACAGCCGAAATCGGCAATT  |
| 10[48]  | 14[42]  | CTCAATCAAGGAATTGAGGATAACTCGTACCAGAA                |
| 55[63]  | 59[76]  | AATGGAACGTCATATATAAACTATTCTGGCGGATAAGTGCCG         |
| 0[125]  | 22[112] | TATTAAGAACGTGAGGGTTGGAAGATTTAAATTTAAGATTC          |
| 0[83]   | 18[70]  | TCTATCAGCCGATTAATTAACCGGGAGA                       |
| 48[83]  | 48[91]  | AATGCAATCAACAATAAATTCGAGCTTCCGGGTAA                |
| 49[63]  | 43[69]  | AGGCCGATTAAAGAGGTAAAGTTTATTGAAACGCAAAGAAGAAACGC    |
| 22[69]  | 19[62]  | TTAATTAACCTTGCAAAACAAAATTAATTTACCTG                |
| 35[91]  | 54[84]  | GGGGGTAGAAAGAGGTGTCGAAAAGGAACAACCTCC               |
| 38[41]  | 4[35]   | AATAAGATACATAAAAACATAAATTGCGTTTGCACCTTGCTGGTCAATCG |
| 6[55]   | 28[49]  | ACCTGAAATGCGCGATACATTTGAGGAACTTACCA                |
| 21[49]  | 55[55]  | TATGTGATTTATCCCTTACCATAGCTATAGAAGGATTTGATGCTCATTA  |
| 46[83]  | 26[84]  | TCATCACGTACCGCTAAGTCCTAAGTTTGACCATTGCATTA          |
| 12[62]  | 10[49]  | ATAGATAAACTGATCGAACACCAGCAGACGCTGATCAAACC          |
| 34[48]  | 39[48]  | AGGAATCTAGAAGGCAAGATTCCTGAATCAATCCAATGAAAA         |
| 30[111] | 35[111] | AGGTCATACCAGACCCGAAAGCAGGTCTTGCTTTAAATGTTT         |
| 34[62]  | 13[62]  | TTTATTTAACTTTTCCTAAATCCTTTGC                       |
| 29[49]  | 33[48]  | CAACGCCGTACCGACAAAAGGCAACATGATTTACGTTTCCTT         |
| 43[112] | 55[118] | TCATCAAAGCATTACAGACGTT                             |
| 53[56]  | 29[62]  | GAGCCACACCGGAAGGAGGGAGTGAATTAATGCAGATATAAAAACATGT  |
| 39[49]  | 57[55]  | TAGCAGCAACTGAACACAAGAAAAGTATAGTAACA                |
| 49[49]  | 54[42]  | CATTACCTCAGTAGCGACAGACGTTTTCCACCACCAACCGCCGAGGCAG  |
| 29[63]  | 23[69]  | AATTTAGGCGTTATAGAAAACTTCTGATCAAAATAACCTCTCATAGG    |
| 24[62]  | 6[56]   | CGGCTTACATCAATGGAACAACAGTAATCCTTCTG                |
| 5[91]   | 15[90]  | CAGTCGGCGCATCGTAACCTTATCATCA                       |
| 9[105]  | 6[105]  | CGACGGCGAGCTCGCAATTCCGTGAGCT                       |
| 8[97]   | 11[90]  | AATCATGACGACGTGGGTAACGCCAGGGAACCATT                |
| 5[105]  | 0[98]   | GTCGTGCGGCGCCACGCCTGGAATCCTGCCGAGATGACTCCAACGTCAA  |
| 50[76]  | 54[63]  | CCATCGATAGCAGCTCATAGCCAAAATCCACCCTCCGCCAGC         |
| 10[69]  | 15[69]  | CTGAACCTAAAATAGCCGTCACCGAACGATTTTGCATAATCC         |
| 30[90]  | 30[70]  | TAGAGCTTATCGAGCCAGTAA                              |
| 10[111] | 14[105] | AAGGCGAGTTGGGACCGGAAAGGGACGATTGGTGT                |
| 15[105] | 19[111] | CGAGTAACGTCTGGTTCGCATGTATAAGTAAAACT                |
| 20[41]  | 2[35]   | TCATTTGGAGGCGAGAATACCGAGGCCATGCCTGA                |
| 47[49]  | 49[62]  | GATTGAGCCAGAGCATCGGCATTTTTCGGACCGTAAATTAGCA        |
| 57[77]  | 42[84]  | GCCCCCTACCGTTCACGTGTACAGACCAAATAAGG                |
| 51[98]  | 47[111] | CCGATAGAAGGCCGGACAGCATCGGAACAAGTTTCAAAGAGG         |
| 34[41]  | 8[35]   | ATTACCGCAAGACTACCGACATTTCGACTTAGAAGGCTATTAACAGAG   |
| 32[125] | 9[125]  | GATTAAGTGTTTAGTCATTCCTCGGTGCGGGGATAAGCTTG          |
| 59[56]  | 23[62]  | GTACCAGAAACATGATTGAGTATAGCAAACGCTAATTGAAGCATCAAAA  |
| 15[49]  | 46[49]  | GGCAATTGGTTGGGGCGAGAATCATCGTATCATTCAATCAAT         |
| 0[55]   | 36[49]  | CAGGAACAAAGAGTCGCCTGATCAGGTTCTTAGAATGAATTTCTTAAAT  |
| 6[118]  | 30[112] | CTAATGAACACAACCTCTGGTGAGGGCGAATATAACGTTTTAATGATAAG |
| 40[104] | 21[104] | GAACCTGGAATCTACATTCAACACCGTTC                      |
| 55[35]  | 33[41]  | CAAACAAGTCAGACACATACATCATATGGGCTGTC                |
| 8[83]   | 8[84]   | CTGTTCAATAAAAATGAAAAATCTAATTCCCAGTCGTCATAG         |
| 40[125] | 21[125] | AATTACCCTAACGGGTTGAGAATGCCGG                       |
| 55[77]  | 55[97]  | TCTCTGAATACGATCTAAAGT                              |
| 55[98]  | 33[104] | TTTGTGCGAGAATAGAATCCGCAAAGTACCAAAAAT               |
| 36[125] | 6[119]  | AAAACCAATATATTGGTTGTATCGGATTTGGGATAATTAATGGGGGTGC  |
| 59[91]  | 37[104] | ATAAGTATAGCCCGTCAGAGCACGAGTACTGCTCAGGAATTA         |
| 54[83]  | 44[84]  | ACCACCACCGCCTGATAAATTGACAGAT                       |
| 59[77]  | 40[77]  | TCGAGAGATTTCCGGAGCCTGACGAGAAAATACCAGTCAAGGGA       |
| 4[55]   | 26[49]  | CTACATTACACGACAGAAACCATTAATTTAATGG                 |
| 42[48]  | 39[41]  | CTTACCGGATAACCCACCCTGAACAAAGGTCAAAA                |
| 5[63]   | 0[56]   | AAAAGGGGCTCATGCGCCAGCTACTTCTTACGCAAAGGGATTTAGA     |

|         |         |                                                   |
|---------|---------|---------------------------------------------------|
| 25[84]  | 5[90]   | ATCATACTTGCGGGAGAAGCTTTGGATTTGAGTAAGGCTGCCCGCTTTC |
| 31[112] | 52[105] | CGGAAGCCATGAGGGAGGGTACTTGCAGGGAGTTATTGCGCCAGCTTGC |
| 53[35]  | 29[41]  | CCCTCAGGGAACCGGGCGACACTTGAGCCAATAAATAAAGTAATCGCCA |
| 2[97]   | 17[90]  | GTGGTTCTGATTGCGTAGCCAGCTTTACACCGTTA               |
| 20[104] | 2[98]   | TGCCTGAGTAATCGCAAATATGAATAGCTTTGATG               |
| 10[62]  | 6[63]   | TCAAATAGAGCCAGCAGCAAATACCGAAAGCCCTAATAGAAC        |
| 36[104] | 6[98]   | TTTTGCAATAAAAAACCCTGTATGTGAGAGATGGGGAAACCTAACTCAC |
| 55[42]  | 59[55]  | ATAAATCATACAGGTGCCTTGTAAGAGGCGGGGTTTTGCTCA        |
| 37[70]  | 55[76]  | CTTTCCACAAGAAAAATAATACAGTAAGAGCGCAG               |
| 34[104] | 8[98]   | AACAGTTGCAAAGATACTAATGTTTGAGCCAGGCACCGCTCAAATTCGT |
| 20[125] | 2[119]  | CTACAAACAATCATAAACAGAGTGTTGCCCCAGC                |
| 24[48]  | 20[42]  | TTATATATCAATAGTCCTTGAATCAATAACAATT                |
| 53[91]  | 31[104] | AATTGCGAATAATATTTTCGAGTAAAACGCATTAATAAAGCGA       |
| 19[91]  | 38[91]  | ATGAACGGAGTCTGATATTCATAATGCA                      |
| 0[97]   | 19[90]  | AGGGCGAATCAAAAATTAAATTGTAACTAGAATCG               |
| 37[91]  | 57[90]  | GCCAAAATTCAGTGGGCGCATATAGTTAGCGTATTGCTTTCA        |
| 55[56]  | 33[62]  | AAGCCAGATTGACATATAAAATTGTCACCAAGAAC               |
| 59[35]  | 23[41]  | GGATTAGCTGAGACTCAGAGAAAGCCCTATTTTATAGTTGCTAGAAGAG |
| 59[112] | 37[125] | TGTATCACCGTACTCCACCCTAGATGGTACCCAAAAGCAACA        |
| 39[70]  | 39[90]  | TAACATAAAAACGGACGTTGG                             |
| 23[112] | 53[118] | AACCCTCAAATAGCAGACTGGGGAACCGTCCATGTGTTTCAGCACGTTG |
| 51[35]  | 48[42]  | TGTAGCGATCAAGTATCACCAGTAGCACTCACCGA               |
| 55[119] | 33[125] | AGTAAATTTCAACATACTTAGCGATTATGACTATT               |
| 47[42]  | 43[48]  | TTCAACCAGAAAATTAAGGTACTCCTTAGTTACC                |
| 22[104] | 4[98]   | TGAGAAAGTTAAAACCTTCCTCCTTCACGGGTGGT               |
| 27[49]  | 48[49]  | GAATCATCATCCTATTCAGCTATCACCG                      |
| 34[125] | 13[125] | GAATCCCGCAATAACTGAAAAATCGGCC                      |
| 19[112] | 42[112] | AGCATGTGGCTATCTAAATTATTTAGGATAGTAAGTCAACGT        |
| 19[77]  | 0[84]   | ATGAAAGTTTACATCGAATCCCTTATAAAAAACCG               |
| 13[91]  | 33[90]  | TCTGCCAAGTAGTAAGATACAATATCGCGTTTTGAACATGAC        |
| 57[56]  | 35[62]  | GTGCCCGCATGGCTAACCGAGCTGGCATGGTATTC               |

## Supplementary information references

[S1] W. Liu, H. Zhong, R. Wang and N. C. Seeman, *Angew. Chem. Int. Ed.*, 2011, **50**, 264-267.

[S2] V. Linko, M. Eerikäinen and M. A. Kostianen, *Chem. Commun.*, 2015, **51**, 5351-5354.
